# Supplementary material for: Evaporation from microreservoirs
Source: Royal Society of Chemistry journal article supplement (doi:10.1039/b900556k), 2009-01-01
Supplement: b900556k.pdf [file b900556k.pdf]

## Evaporation from Micro-Reservoirs Supplementary Information

N. Scott Lynn, Charles S. Henry, David S. Dandy

### APPENDIX I - Geometrical determination of meniscus shape

The geometrical definitions defining the shape of a meniscus in an expanding reservoir ( $2\alpha > \pi/2$ ) are shown in figure S1. The same definitions associated with cylindrical ( $2\alpha = \pi/2$ ) or contracting ( $2\alpha < \pi/2$ ) reservoirs are very similar and not shown here. The reservoir walls can be described by the line  $r = F(z) = a_1 z + a_2$ . Additional geometric information for this system are the angles

$$\beta_1 = 2\alpha - \frac{\pi}{2}, \quad (1)$$

$$\beta_2 = \pi - 2\alpha - \theta_2, \quad (2)$$

$$\beta_3 = 2\alpha + \theta_2 - \frac{\pi}{2}, \quad (3)$$

as shown in figure S1.

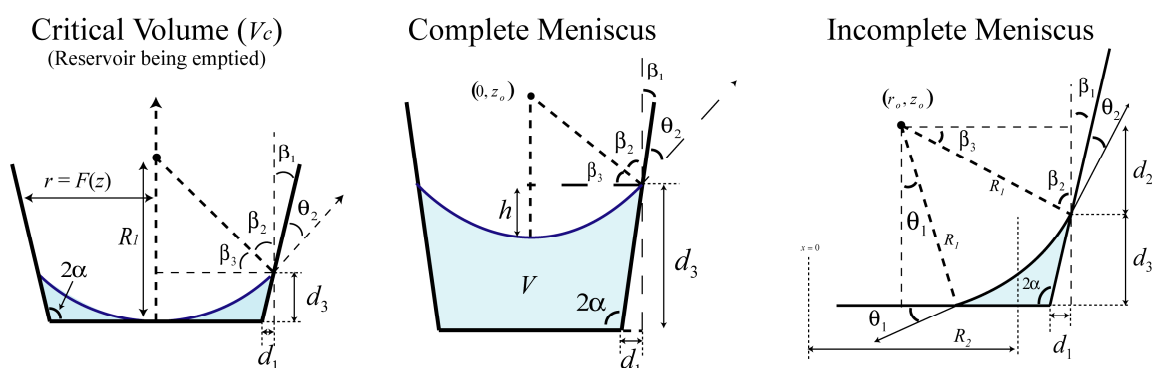

**Figure S1.** Geometries used in the calculation of the meniscus shape.

### Critical volume ( $V_c$ )

The critical volume is the volume at which the meniscus will rupture from a continuous state to form a moving contact line. This event occurs at the liquid volume for which the bottom of the meniscus reaches the reservoir floor ( $z_0 = R_1$ ), and depends only on the reservoir geometry and  $\theta_2$ . The first radius of curvature for this system can be found by equating two relationships for the  $z$ -position of the meniscus intersection with the reservoir sidewalls,

$$d_3 = \frac{2R_1 \cos(\beta_3) - D_1}{2 \tan(\beta_1)}, \quad (4)$$

$$d_3 = R_1(1 - \sin(\beta_3)), \quad (5)$$

which leads to

$$R_1 = \frac{D_1}{2(\cos(\beta_3) + \tan(\beta_1) \sin(\beta_3) - \tan(\beta_1))}. \quad (6)$$

From this value of  $R_1$ , the critical volume can be obtained by  $V_c = V_2 - V_1$ , where

$$V_2 = \pi \int_0^{d_3} F^2 dz = \frac{\pi}{3a_1} ((a_1 d_3 + a_2)^3 - a_2^3), \quad (7)$$

$$V_1 = \frac{\pi}{6} h(3R_m^2 + h^2), \quad (8)$$

using the relationships  $R_m = R_1 \cos(\beta_3)$  and  $h = R_1(1 - \sin(\beta_3))$ .

### Complete Meniscus

This case arises when  $V > V_c$  and  $d_3 < H$ . From the trigonometric relationships

$$d_1 = R_1 \cos(\beta_3), \quad (9)$$

$$d_3 = \frac{d_1}{\tan(\beta_1)}, \quad (10)$$

we solve the equation  $V = V_2 - V_1$  for  $R_1$ , where  $V_2$  and  $V_1$  are given above. The explicit solution for  $R_1$  is very complicated and will not be repeated here. The center of curvature for the meniscus will then be  $(0, z_o)$ , where  $z_o = d_3 + R_1 \sin(\beta_3)$ .

### Incomplete Meniscus

This case arises when  $0 < V < V_c$  (as well as the additional criteria that  $d_3 < H$ ). No analytical solution can be found for  $R_1$  for this geometry, thus the solution must be found iteratively. Using the trigonometric relationships

$$d_2 = R_1 \sin(\beta_3), \quad (11)$$

$$d_3 = R_1 \cos(\theta_1) - d_2, \quad (12)$$

$$d_1 = d_3 \tan(\beta_1), \quad (13)$$

the equation  $V = V_2 - V_1$  is solved for  $R_1$ , where  $V_2$  is given above, and  $V_1$  may be written as

$$V_1 = \pi \int_0^{d_3} F^2 dz = \pi \int_0^{d_3} \left( r_o + (R_1^2 - (z - z_o)^2)^{\frac{1}{2}} \right)^2 dz. \quad (14)$$

Here,  $r_o$  and  $z_o$  are the center of curvature of the meniscus, and can be found via

$$r_o = \frac{D_1}{2} + d_1 - R_1 \cos(\beta_3), \quad (15)$$

$$z_o = d_3 + d_2. \quad (16)$$

## Evaporation from Micro-Reservoirs Supplementary Information

N. Scott Lynn, Charles S. Henry, David S. Dandy

### APPENDIX II – one dimensional diffusion in a reservoir

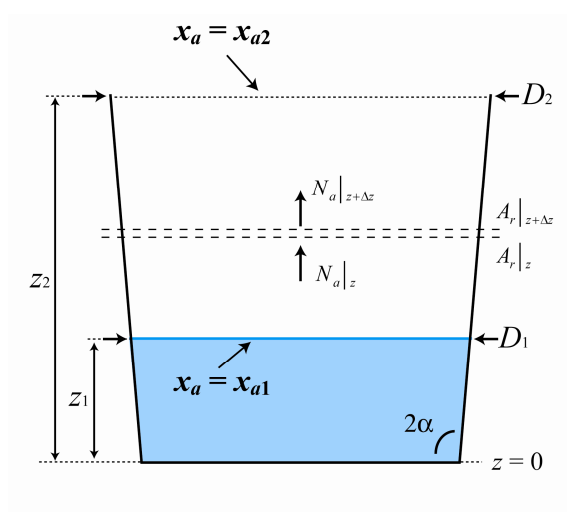

**Figure S2.** Geometric parameters describing the system.

Consider a well with height  $H = z_2$  and liquid level positioned at  $z = z_1$  with upper diameter ( $D_2$ ) and diameter at the meniscus ( $D_1$ ) as shown in Figure S2. Assuming the average interface position ( $z_1$ ) is not moving very fast, we can perform a quasi steady-state mass balance between the plane  $z$  and  $z + \Delta z$  to find

$$\frac{d}{dz}(A_r N_a) = 0, \quad (17)$$

where  $A_r$  is the cross-sectional area of the reservoir and  $N_a$  is the molar flux of water vapor in the  $z$ -direction. Using Fick's first law of binary diffusion, we can also express the molar flux as

$$N_a = -\frac{c\mathcal{D}}{1-x_a} \frac{dx_a}{dz}. \quad (18)$$

Where  $c$  is the molar concentration of the gas phase,  $\mathcal{D}$  is the diffusion coefficient of water vapor, and  $x_a = x_a(z)$  is the mole fraction of water vapor. Again, the reservoir walls can be described by the line  $r = F(z) = a_1 z + a_2$ , thus  $A_r$  can be expressed as a function of  $z$

$$A_r = \pi(a_1 z + a_2)^2. \quad (19)$$

Assuming that both the molar concentration and diffusion coefficient are constant with dilute values of  $x_a$ , substitution of equations (18) and (19) into equation (17) and simplifying yields

$$\frac{d}{dz} \left( \frac{(a_1 z + a_2)^2}{1 - x_a} \frac{dx_a}{dz} \right) = 0. \quad (20)$$

Integration of equation (20) twice with respect to  $z$  yields

$$\ln(1 - x_a) = \frac{C_1}{a_1(a_1 z + a_2)} + C_2. \quad (21)$$

The boundary conditions for this problem are then

$$x_a = x_{a1} \quad \text{at} \quad z = z_1, \quad (22)$$

$$x_a = x_{a2} \quad \text{at} \quad z = z_2, \quad (23)$$

where  $x_{a1}$  and  $x_{a2}$  represent the mole fraction of water vapor at the air/liquid interface and reservoir entrance, respectively. Noting that  $D_1 = 2(a_1 z_1 + a_2)$  and  $D_2 = 2(a_1 z_2 + a_2)$ , the mole fraction distribution can then be found as

$$x_a = 1 - \exp(Y), \quad (24)$$

where

$$Y = \frac{D_1 D_2}{2(D_2 - D_1)(a_1 z + a_2)} \ln \left( \frac{1 - x_{a1}}{1 - x_{a2}} \right) + \frac{D_1 \ln(1 - x_{a2}) - D_1 \ln(1 - x_{a1})}{D_2 - D_1}. \quad (25)$$

Eqn. (25) can be used with Eqn. (18) to calculate the overall one-dimensional evaporation rates. Figure S3 displays the liquid evaporation rate  $Q_e = N_a A_r M_w / \rho$  as a function of the dihedral angle  $2\alpha$  for several different reservoir geometries, where  $M_w$  and  $\rho$  correspond to the molecular weight and density of water, respectively. It can be seen that for all reservoir geometries,  $Q_e$  increases with increasing  $\alpha$  and increasing values of  $D_1$ , consistent with the results of this study.

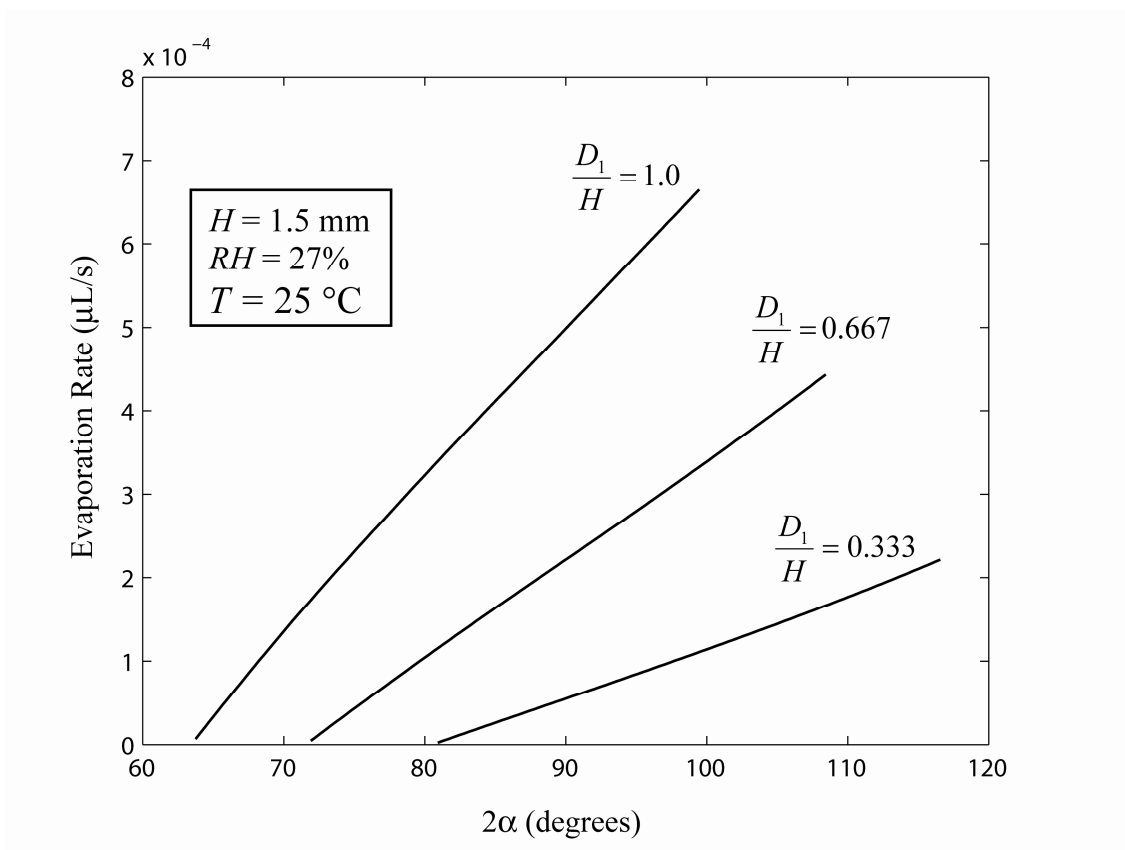

**Figure S3.** Overall evaporation rate ( $Q_e$ ) vs. the dihedral angle  $2\alpha$  for three different reservoirs with varying values of  $D_1$ .
